# Supplementary material for: A Simplified Protocol for Reversing Phenotypic Conversion of Ralstonia solanacearum during Experimentation
Source: Int J Environ Res Public Health. 2020 Jun 15;17(12):4274. doi: 10.3390/ijerph17124274 (PMC7344456; doi:10.3390/ijerph17124274)
Supplement: Supplementary file 1 [file ijerph-17-04274-s001.pdf]

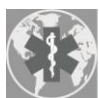

## Supplementary

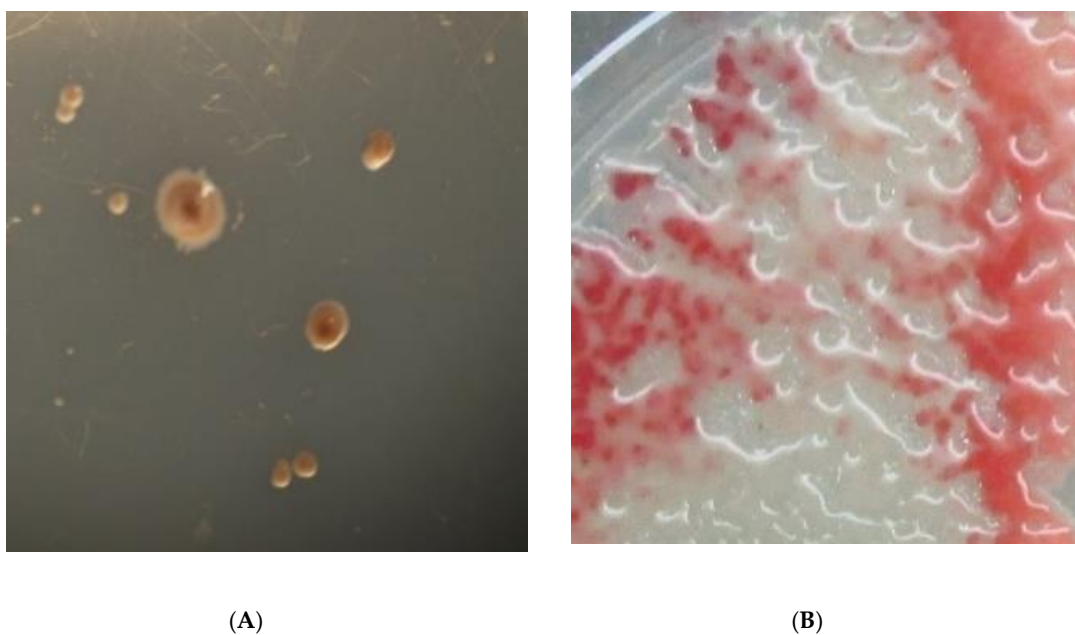

**Figure S1.** Colony morphology of strain used for *gfp* labeling, (A) Single colony morphology in stereo microscope, and (B) Colonies in Petri plate.

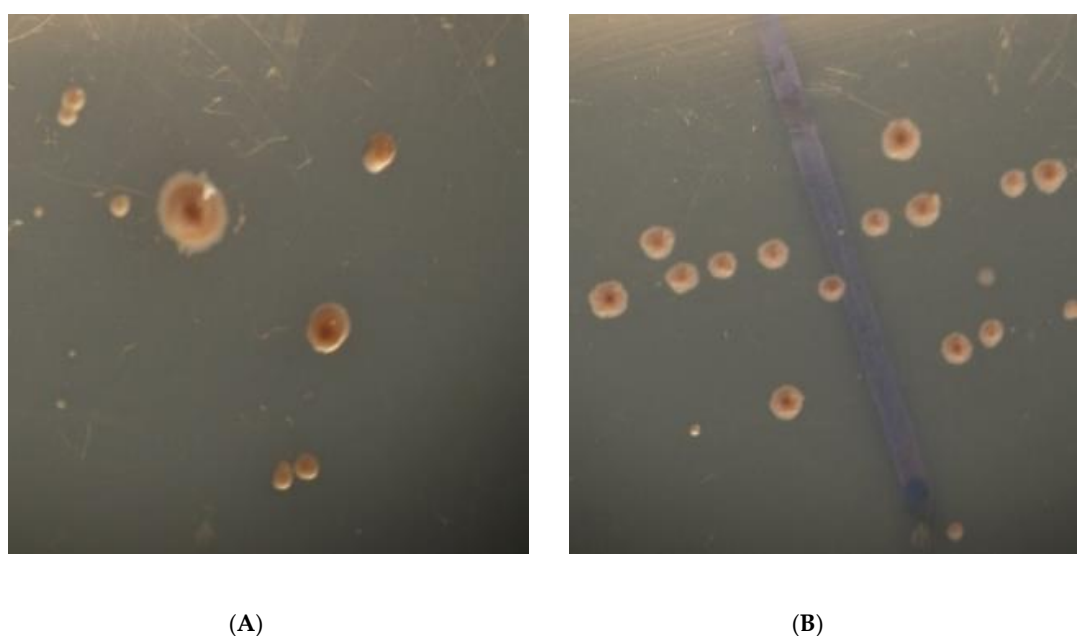

**Figure S2.** Colony morphology of strain before (A) and after *gfp* labeling (B).
